# Supplementary material
Source: PubMed Central journal article supplement (PMC11080931)

# Figure S6

A

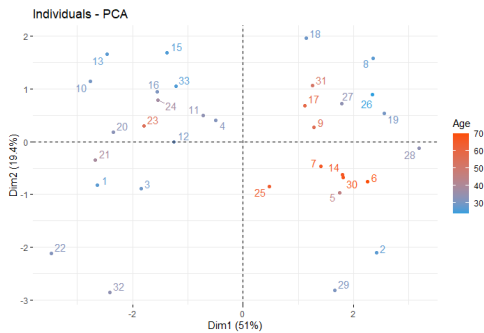

B

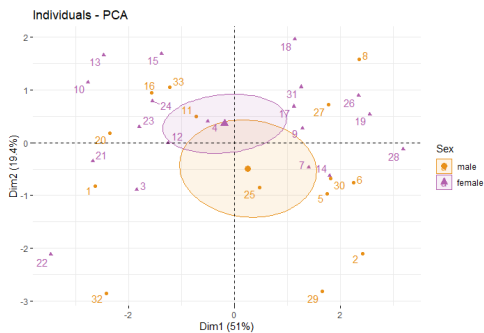

Supplement: JEX2-1-e37-s001.pdf [file JEX2-1-e37-s001.pdf]
