# Supplementary material
Source: PubMed Central journal article supplement (PMC11080931)

# Figure S1

A

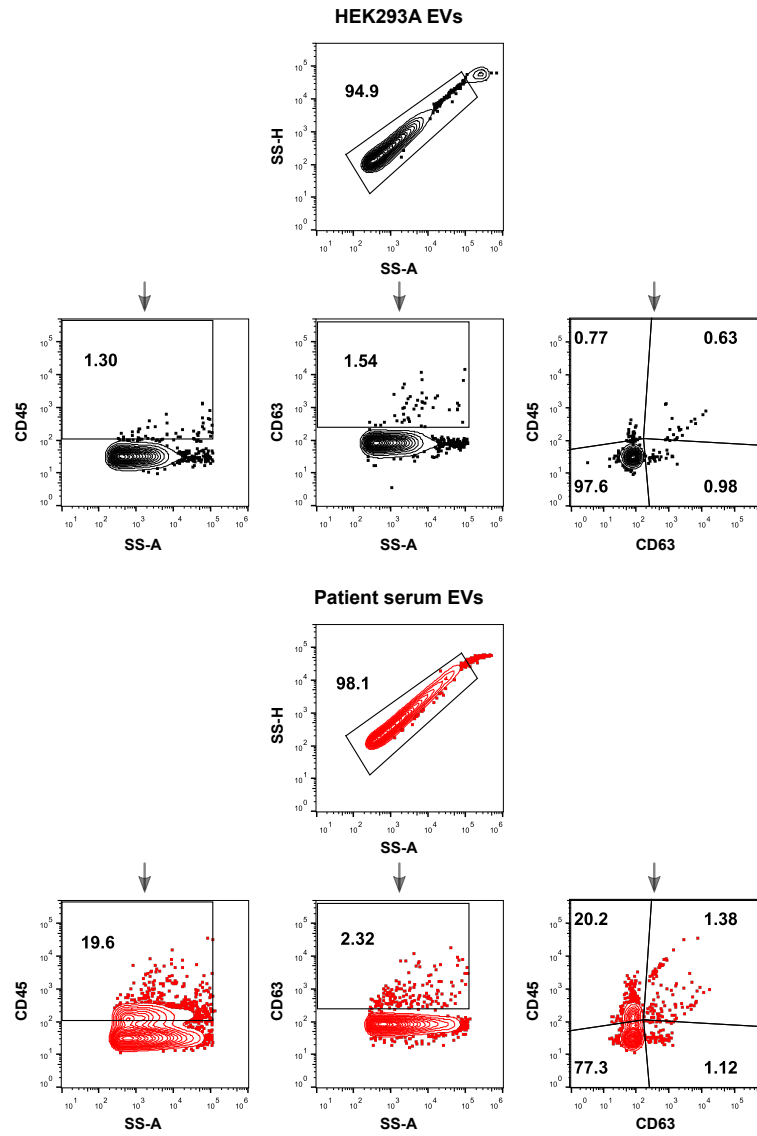

B

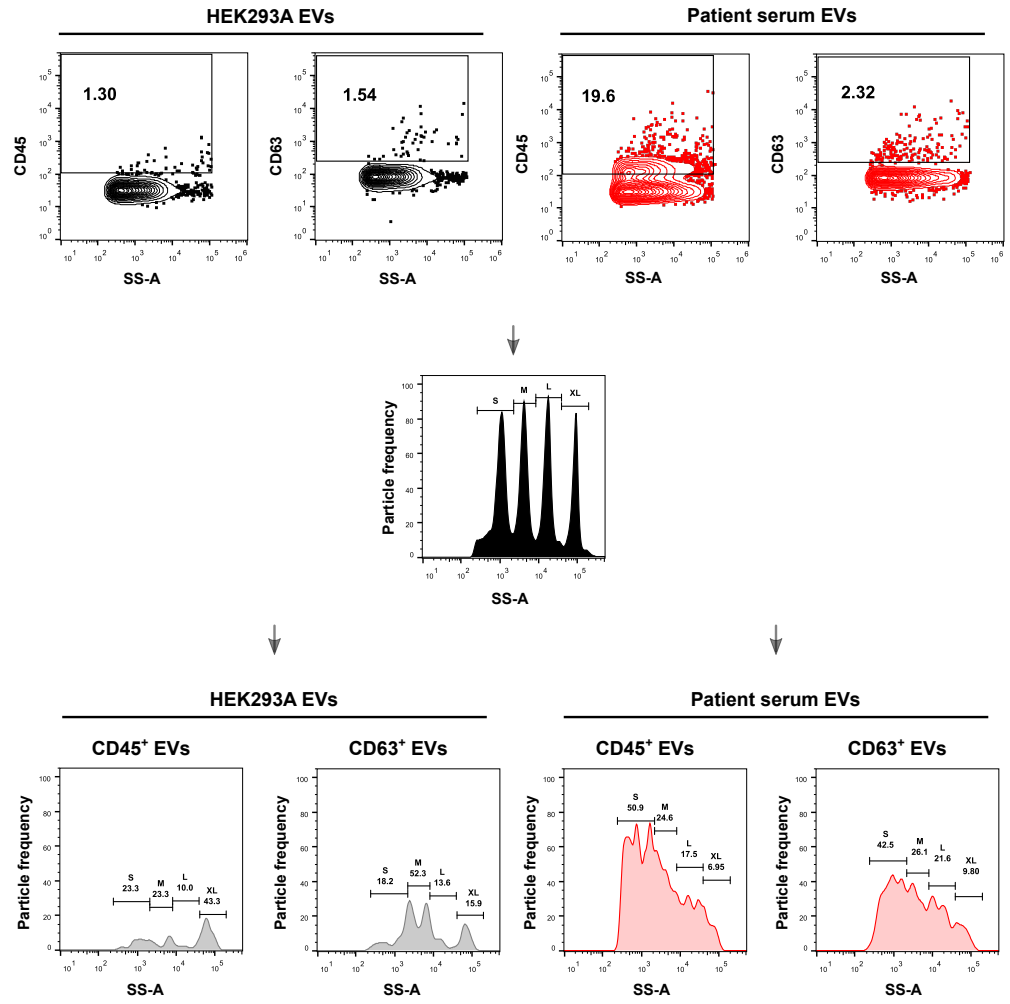

C

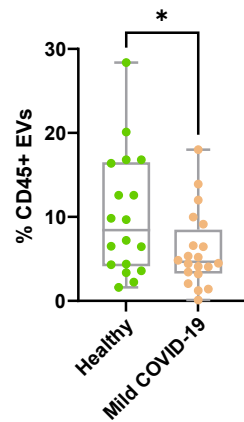

D

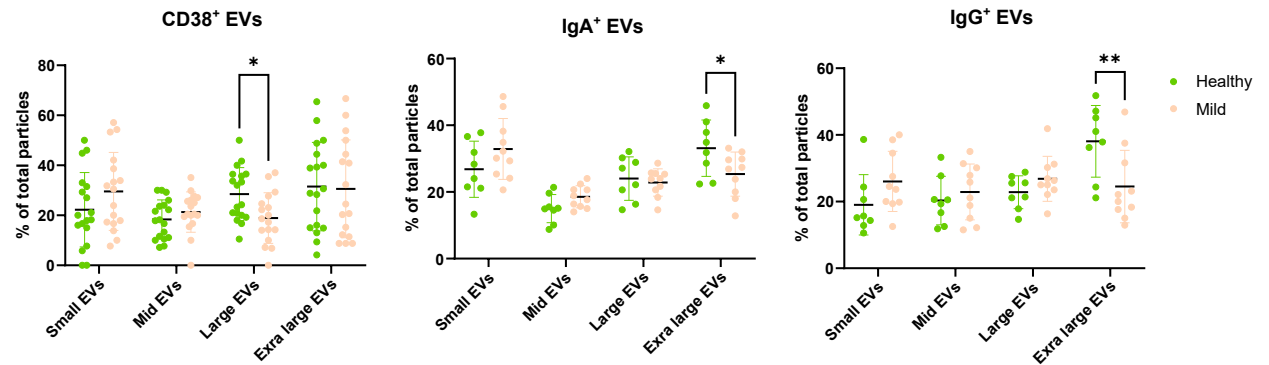

Supplement: JEX2-1-e37-s002.pdf [file JEX2-1-e37-s002.pdf]
