# Supplementary material
Source: PubMed Central journal article supplement (PMC11080931)
Supplement: JEX2-1-e37-s003.pdf [file JEX2-1-e37-s003.pdf]

# Table S1

| Antibodies                                                                                      | Source        | Identifier  | Concentration | Dilutions |
|-------------------------------------------------------------------------------------------------|---------------|-------------|---------------|-----------|
| <b>Serum EVs</b>                                                                                |               |             |               |           |
| FITC anti-human CD45 (HI30)                                                                     | Biolegend     | 304005      | 0.5 mg/ml     | 1/200     |
| PE anti-human CD63 (H5C6)                                                                       | Biolegend     | 353003      | 0.5 mg/ml     | 1/200     |
| FITC anti-human CD19 (HIB19)                                                                    | Biolegend     | 302205      | 0.5 mg/ml     | 1/200     |
| PE anti-human CD56 (5.1H11)                                                                     | Biolegend     | 981202      | 100 µg/mL     | 1/200     |
| FITC anti-human CD31 (WM59)                                                                     | Biolegend     | 303103      | 0.5 mg/ml     | 1/200     |
| FITC anti-human CD4 (SK3)                                                                       | Biolegend     | 980802      | 50 µg/mL      | 1/200     |
| PE anti-human CD14 (M5E2)                                                                       | Biolegend     | 982508      | 200 µg/mL     | 1/200     |
| SARS-CoV-2 Spike S1 Subunit Alexa Fluor® 647-conjugated (Monoclonal Mouse IgG1 Clone # 1035206) | R&D Systems   | FAB105403R  | 100 µg/mL     | 1/200     |
| PE anti-human CD193/CCR3 (5E8)                                                                  | Biolegend     | 310706      | 0.5 mg/ml     | 1/200     |
| FITC anti-human CD66b (G10F5)                                                                   | Biolegend     | 305104      | 0.5 mg/ml     | 1/200     |
| FITC anti-human IgG (M1310G05)                                                                  | Biolegend     | 410719      | 100 µg/mL     | 1/200     |
| FITC anti-human IgA (IS11-8E10)                                                                 | Miltenyi      | 130-114-001 | 100 µg/mL     | 1/200     |
| FITC anti-CD38 (HIT2)                                                                           | Biolegend     | 303503      | 100 µg/mL     | 1/200     |
| <b>PBMCs</b>                                                                                    |               |             |               |           |
| Alexa Fluor® 700 anti-human CD45 (HI30)                                                         | Biolegend     | 304023      | 0.5 mg/ml     | 1/200     |
| Brilliant Violet 421™ anti-human CD19 (HIB19)                                                   | Biolegend     | 302233      | 100 µg/mL     | 1/200     |
| PE/Cyanine5 anti-human CD86 (IT2.2)                                                             | Biolegend     | 305407      | 100 µg/mL     | 1/200     |
| PE anti-human IgM (MHM-88)                                                                      | Biolegend     | 314507      | 100 µg/mL     | 1/200     |
| Goat anti-Human IgA (Polyclonal)                                                                | Thermo Fisher | H14001      | 200 µg/mL     | 1/200     |
| FITC anti-human CD4 (OKT4)                                                                      | Biolegend     | 317407      | 100 µg/mL     | 1/200     |
| PE anti-human CD8a (HIT8a)                                                                      | Biolegend     | 300907      | 100 µg/mL     | 1/200     |
| PE/Cyanine5 anti-human CD69 (FN50)                                                              | Biolegend     | 310907      | 100 µg/mL     | 1/200     |
| Brilliant Violet 711™ anti-human IFN-γ (4S.B3)                                                  | Biolegend     | 502539      | 100 µg/mL     | 1/200     |
| Brilliant Violet 421™ anti-human TNF-α (MAB11)                                                  | Biolegend     | 502931      | 100 µg/mL     | 1/200     |
