# Supplementary material
Source: PubMed Central journal article supplement (PMC11080931)

# Figure S3

CD45

CD63

UC

SEC

UC

SEC

Unstained

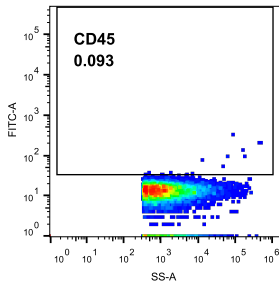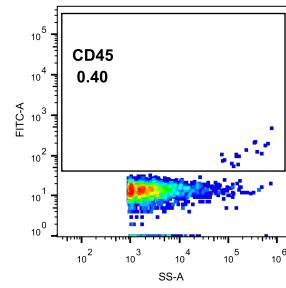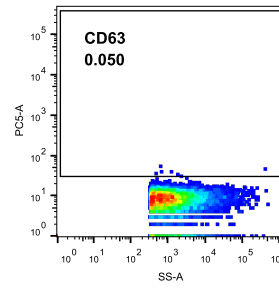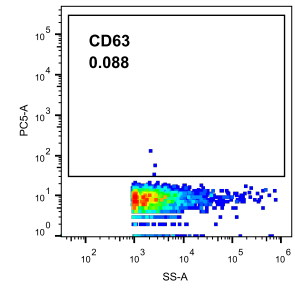

Stained

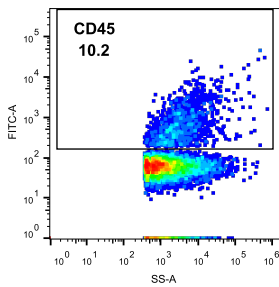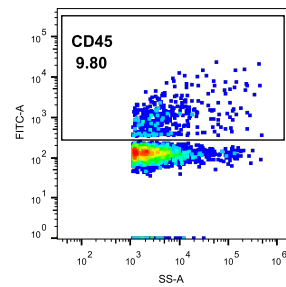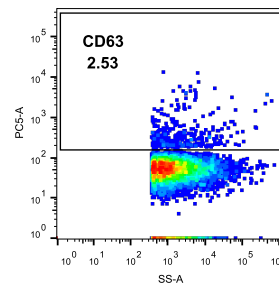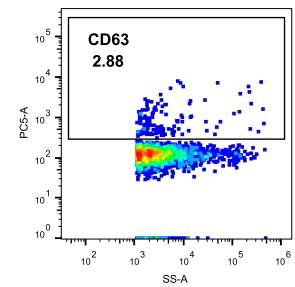

Stained  
(1% Triton-X treated)

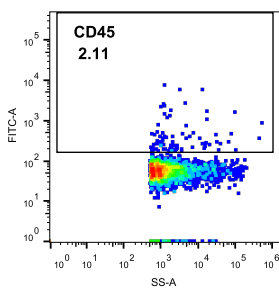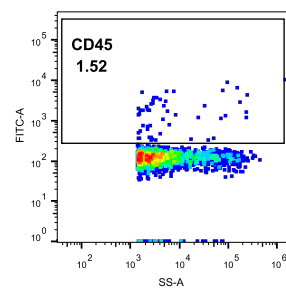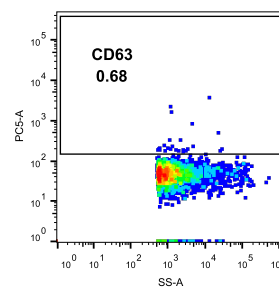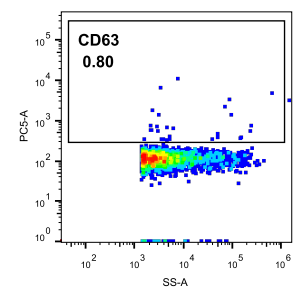

CD45

CD63

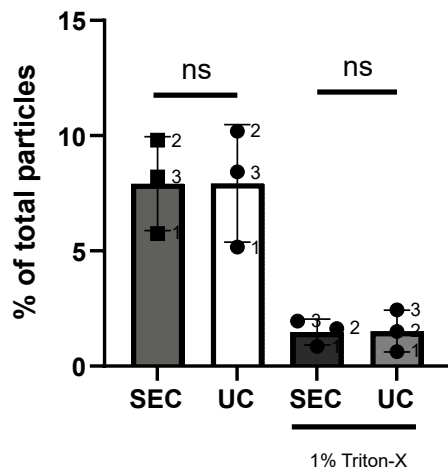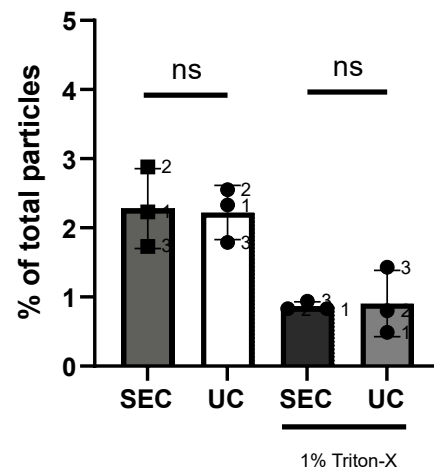

Supplement: JEX2-1-e37-s004.pdf [file JEX2-1-e37-s004.pdf]
