# Supplementary material
Source: PubMed Central journal article supplement (PMC11080931)

# Figure S4

A

HEK293A co-transfected with GFP and Spike S1 plasmids (0.5 ug)

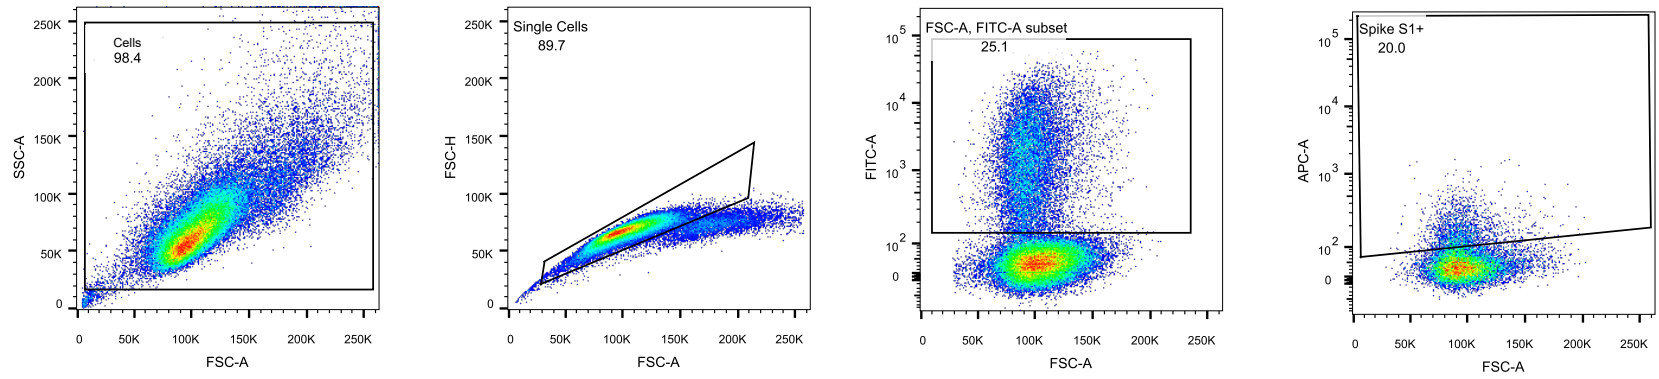

B

Titration of anti-Spike S1 (anti-S1) with recombinant Spike S1 protein (rS1)

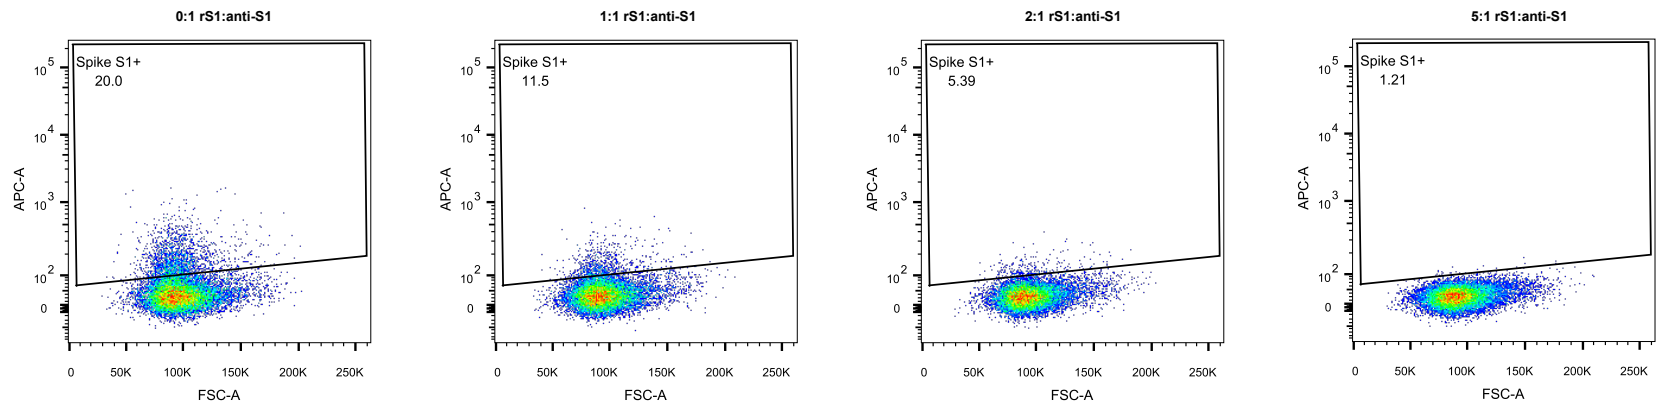

C

S1-HEK293 derived EVs

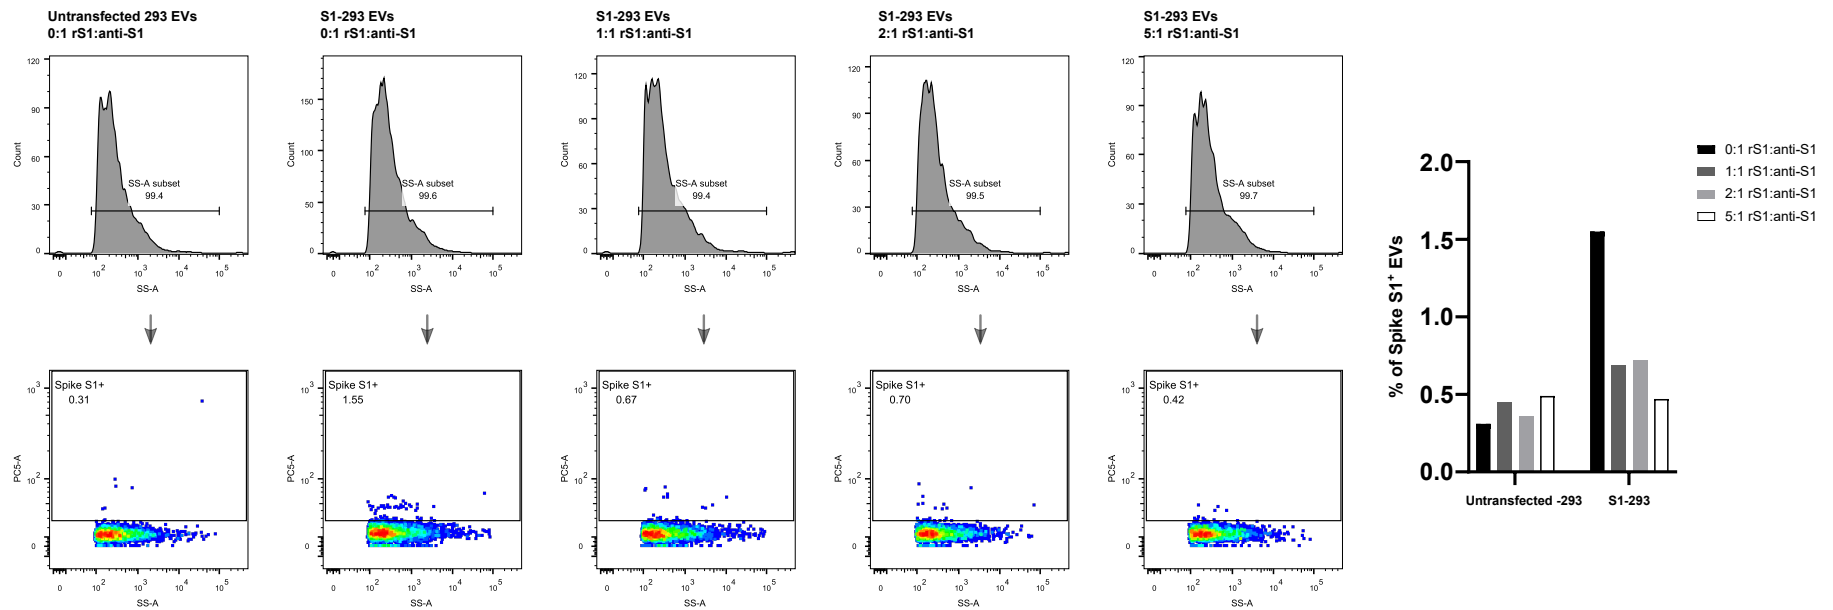

Supplement: JEX2-1-e37-s005.pdf [file JEX2-1-e37-s005.pdf]
