# Supplementary material
Source: PubMed Central journal article supplement (PMC11080931)

# Figure S5

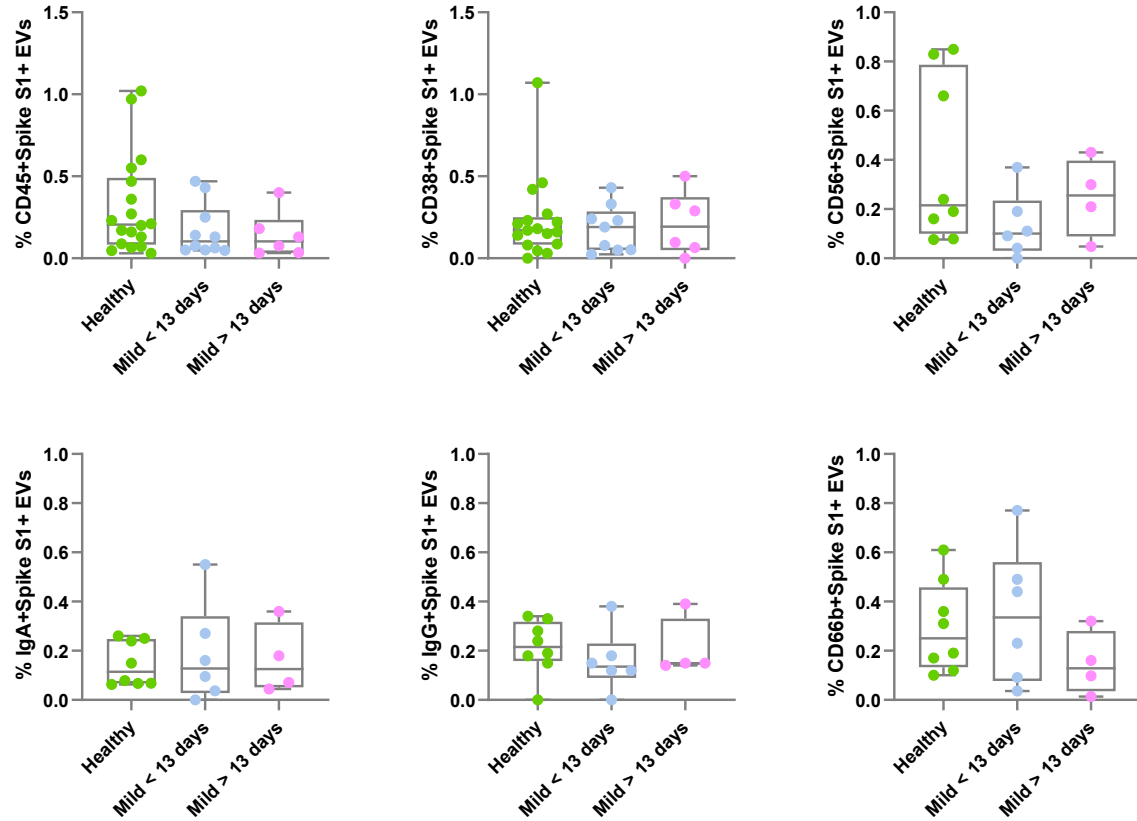

Supplement: JEX2-1-e37-s006.pdf [file JEX2-1-e37-s006.pdf]
