# Supplementary material
Source: PubMed Central journal article supplement (PMC11080931)

# Figure S2

**A**

## Nanoflow scatter histograms and dot plots

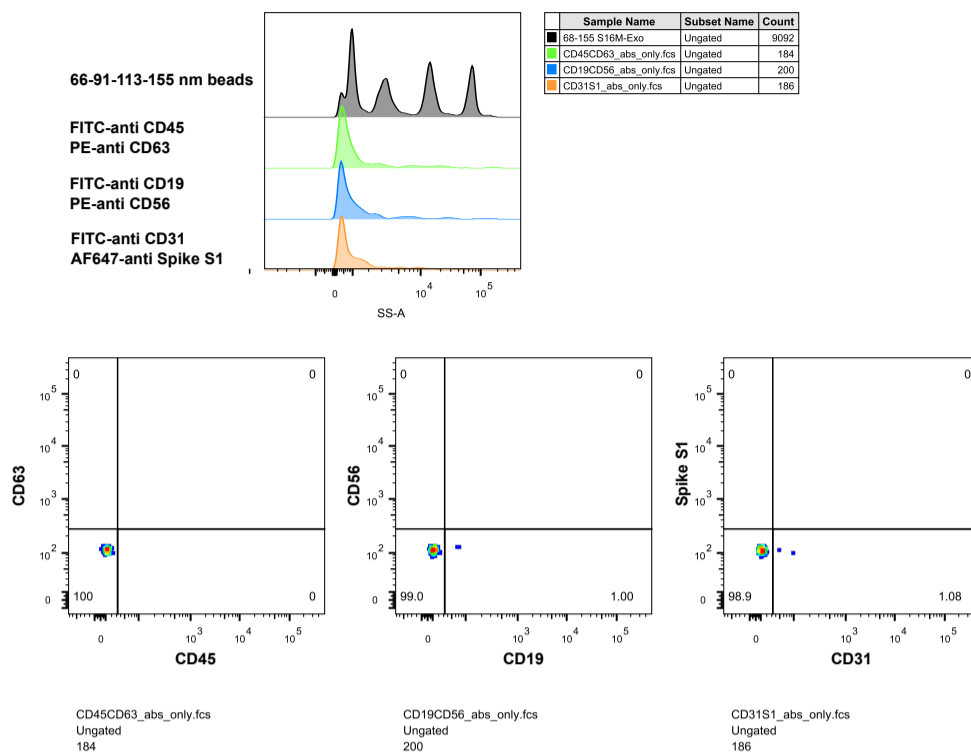

**B**

## Nanoflow scatter histograms and dot plots

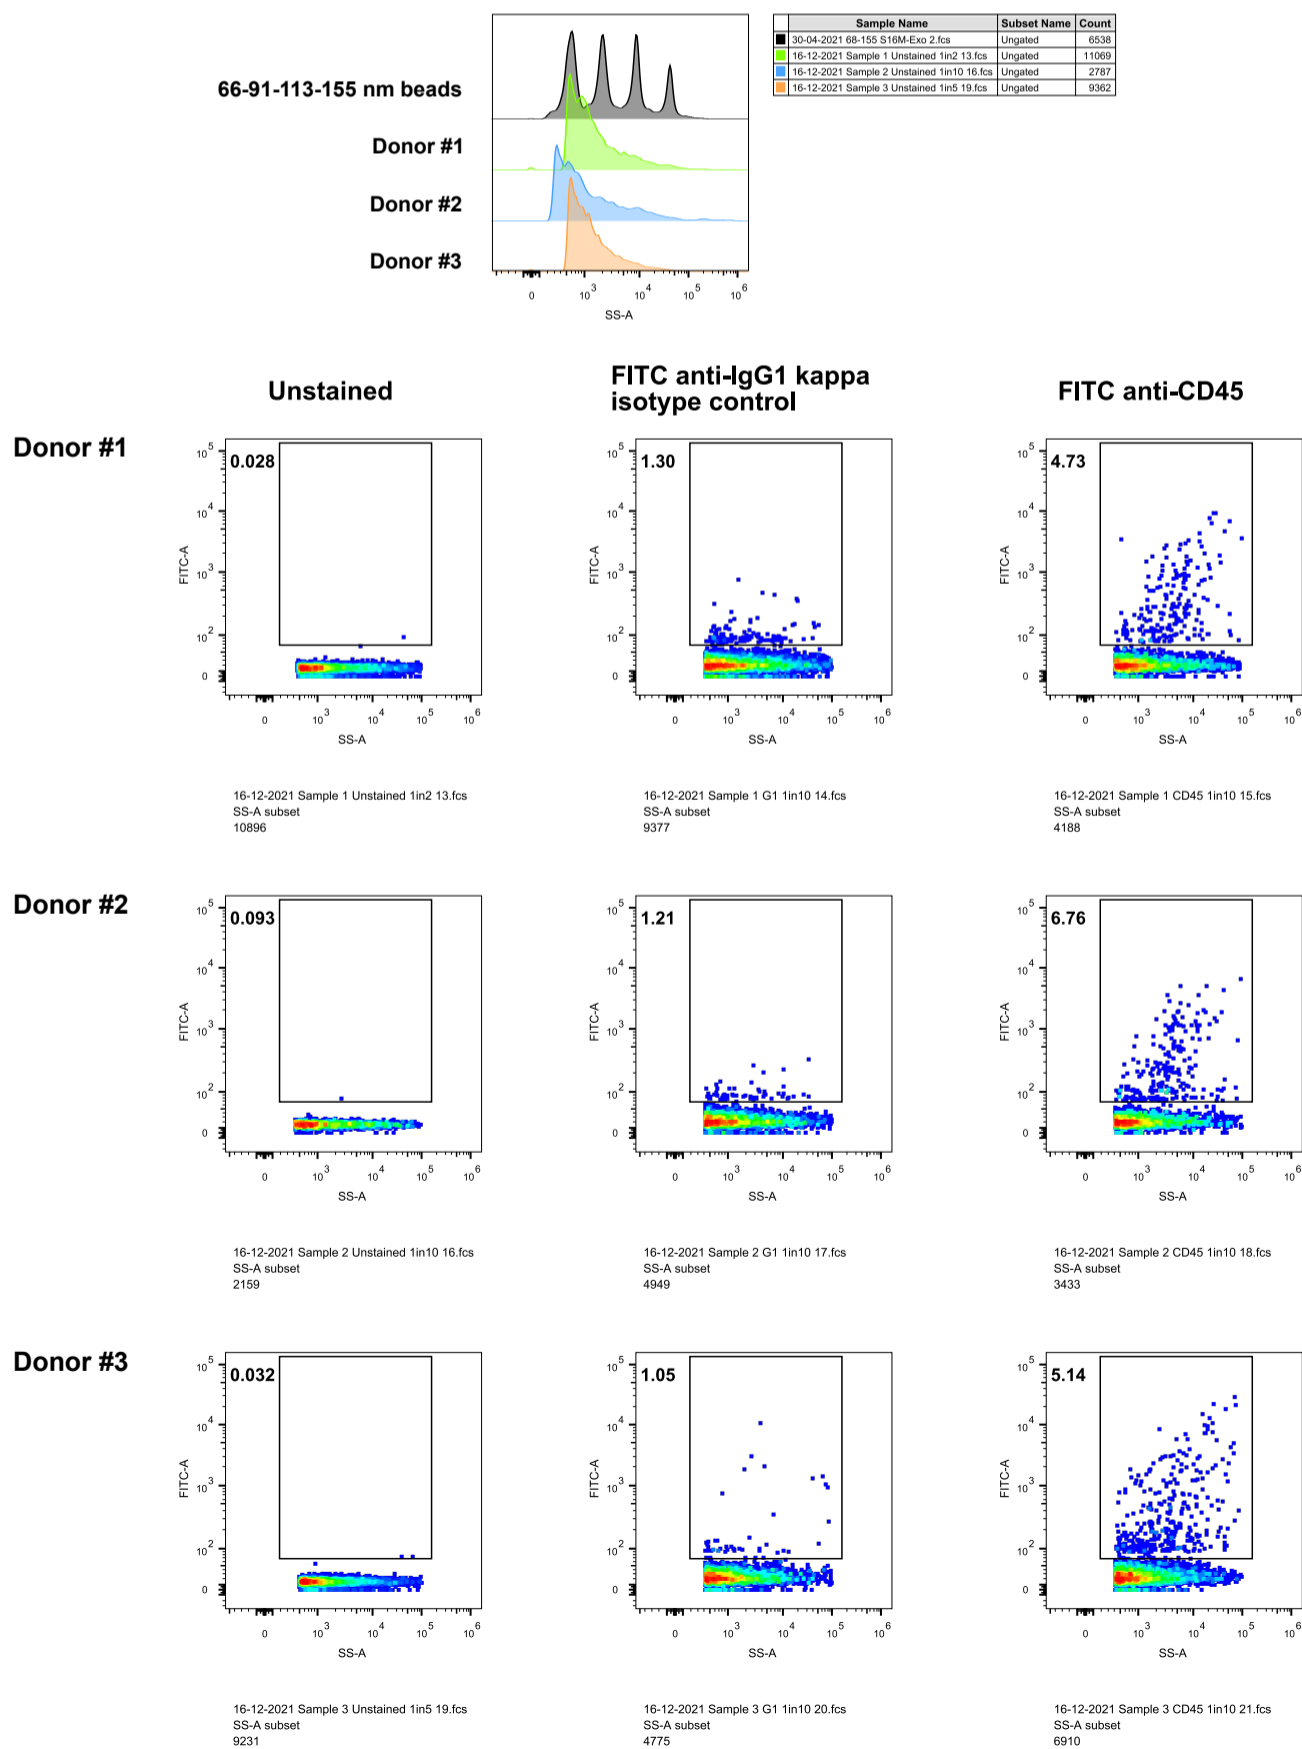

Supplement: JEX2-1-e37-s007.pdf [file JEX2-1-e37-s007.pdf]
